# Supplementary material
Source: publisher figshare collection journal article supplement (https://frontiersin.figshare.com/ndownloader/files/13513094)
Supplement: Supplementary file 1 [file 13513094]

## Sheet: Sheet3
Supplementary Table 1. Species observed in the VELMU programme 2004-2016 from dives and videos, observation thresholds of species included in the model iterations, and a weighting group where each species belongs to (Highest weighting criteria reported. If species belongs to another weighting group, the weights have been balanced accordingly).
Group	Species	Count	Included in modelling	Presence threshold
IUCN Red List of Ecosystems	Climacium dendroides	1-100	x	10
IUCN Red List of Ecosystems	Acrosiphonia arcta	1-100	x	10
IUCN Red List of Ecosystems	Aglaothamnion roseum	1-100	x	10
Vascular plants	Agrostis sp.	1-100
Vascular plants	Agrostis stolonifera	101-500
Vascular plants	Alisma plantago-aquatica	101-500	x	0.1
Threatened species	Alisma wahlenbergii	101-500	x	0.1
Vascular plants	Allium schoenoprasum	1-100
Vascular plants	Alnus glutinosa	1-100
Vascular plants	Alopecurus geniculatus	1-100
Threatened species	Ammophila arenaria	1-100
Vascular plants	Angelica archangelica ssp. litoralis	1-100
Invertebrates	Anodonta anatina	501-1000
Vascular plants	Argentina anserina	1-100
Threatened species	Artemisia campestris	1-100
Invertebrates	Asellus aquaticus	1-100
Vascular plants	Aster tripolium (Tripolium vulgare)	1-100
Vascular plants	Atriplex prostrata	1-100
Algae	Audouinella efflorescens	1-100
Algae	Audouinella purpurea	1-100	x	0.1
Algae	Audouinella sp.	1-100	x	0.1
Invertebrates	Aurelia aurita	1-100
Invertebrates	Balanus improvisus (Amphibalanus improvisus)	10001-50000
IUCN Red List of Ecosystems	Bangia atropurpurea	1-100	x	10
Algae	Batrachospermum atrum	1-100
Algae	Batrachospermum sp.	1-100
Bacteria	Beggiatoa sp.	1001-5000	x	0.1
Vascular plants	Bidens sp.	1-100
Invertebrates	Bithynia tentaculata	1-100
Invertebrates	Bivalvia	1-100
Vascular plants	Bolboschoenus maritimus	1-100	x	0.1
IUCN Red List of Ecosystems	Bryophyta sp.	101-500	x	10
Vascular plants	Butomus umbellatus	1-100	x	0.1
Vascular plants	Calamagrostis sp.	1-100
Vascular plants	Calamagrostis stricta	1-100
Vascular plants	Calla palustris	1-100
IUCN Red List of Ecosystems	Calliergon cordifolium	1-100	x	10
IUCN Red List of Ecosystems	Calliergon megalophyllum	1-100	x	10
Vascular plants	Callitriche cophocarpa	1-100	x	0.1
Vascular plants	Callitriche hermaphroditica	1001-5000	x	0.1
Vascular plants	Callitriche palustris	101-500	x	0.1
Vascular plants	Callitriche sp.	101-500
Vascular plants	Caltha palustris	1-100
Vascular plants	Capsella bursa-pasturis	1-100
Vascular plants	Cardamine pratensis cf.	1-100
Vascular plants	Carex acuta	1-100
Vascular plants	Carex aquatilis	1-100
Vascular plants	Carex canescens	1-100
Vascular plants	Carex cespitosa	1-100
Vascular plants	Carex diandra	1-100
Vascular plants	Carex nigra	1-100
Vascular plants	Carex paleacea	1-100
Vascular plants	Carex rostrata	1-100
Vascular plants	Carex sp.	1-100
Vascular plants	Carex vesicaria	1-100
IUCN Red List of Ecosystems	Ceramium sp.	1001-5000	x	10
IUCN Red List of Ecosystems	Ceramium tenuicorne	5001-10000	x	10
IUCN Red List of Ecosystems	Ceramium virgatum (rubrum)	1-100	x	10
Invertebrates	Cerastoderma glaucum	501-1000	x	0.1
Invertebrates	Cerastoderma/Macoma baltica/Mya arenaria shells	10001-50000
IUCN Red List of Ecosystems	Ceratophyllum demersum	1001-5000	x	10
IUCN Red List of Ecosystems	Ceratophyllum sp.	1-100	x	10
IUCN Red List of Ecosystems	Ceratophyllum submersum	1-100	x	10
Algae	Chaetomorpha linum	1-100	x	0.1
Algae	Chaetomorpha sp.	1-100
Algae	Chaetophora incrassata	1-100
Vascular plants	Chamerion angustifolium (Epilobium angustifolium)	1-100
IUCN Red List of Ecosystems	Chara aspera	1001-5000	x	10
IUCN Red List of Ecosystems	Chara aspera var. subinermis	1-100	x	10
IUCN Red List of Ecosystems	Chara baltica	101-500	x	10
IUCN Red List of Ecosystems	Chara baltica var breviaculeata	1-100	x	10
IUCN Red List of Ecosystems	Chara baltica/horrida	1-100	x	10
Threatened species	Chara braunii	1-100	x	10
IUCN Red List of Ecosystems	Chara canescens	101-500	x	10
IUCN Red List of Ecosystems	Chara cf. globularis	1-100	x	10
IUCN Red List of Ecosystems	Chara globularis	501-1000	x	10
IUCN Red List of Ecosystems	Chara globularis var. Virgata	1-100	x	10
Threatened species	Chara horrida	1-100	x	10
IUCN Red List of Ecosystems	Chara sp.	501-1000	x	10
IUCN Red List of Ecosystems	Chara tomentosa	1001-5000	x	10
IUCN Red List of Ecosystems	Chara virgata	1-100	x	10
IUCN Red List of Ecosystems	Chara virgata/globularis	1-100	x	10
IUCN Red List of Ecosystems	Chara/Nitella	1001-5000	x	10
Algae	Charales	1-100
Vascular plants	Chenopodium sp.	1-100
Invertebrates	Chironomidae	1-100
Algae	Chorda / Halosiphon	101-500	x	0.1
Algae	Chorda filum	5001-10000	x	0.1
Vascular plants	Cicuta virosa	1-100
Vascular plants	Cicuta virosa cf.	1-100
IUCN Red List of Ecosystems	Cladophora aegagropila (Aegagrophila linnaei)	1001-5000	x	10
IUCN Red List of Ecosystems	Cladophora fracta	101-500	x	10
IUCN Red List of Ecosystems	Cladophora glomerata	5001-10000	x	10
IUCN Red List of Ecosystems	Cladophora rupestris	1001-5000	x	10
Algae	Cladophora sp.	1001-5000
IUCN Red List of Ecosystems	Coccotylus truncatus/ Phyllophora pseudoceranoides	1001-5000	x	10
Invertebrates	Copepoda	101-500
IUCN Red List of Ecosystems	Cordylophora caspia	1001-5000	x	10
Invertebrates	Corixidae	1-100
Invertebrates	Crangon crangon	1-100
Threatened species	Crassula aquatica	1-100
Vascular plants	Cyperaceae spp.	1-100
Invertebrates	Decapoda	1-100
Vascular plants	Deschampsia bottnica	1-100
Vascular plants	Deschampsia flexuosa	1-100
IUCN Red List of Ecosystems	Dictyosiphon chordaria	1-100	x	10
IUCN Red List of Ecosystems	Dictyosiphon foeniculaceus	501-1000	x	10
IUCN Red List of Ecosystems	Dictyosiphon foeniculaceus / Stictyosiphon tortilis	501-1000	x	10
IUCN Red List of Ecosystems	Dictyosiphon sp.	1-100	x	10
Invertebrates	Dreissena polymorpha	501-1000	x	0.1
IUCN Red List of Ecosystems	Drepanocladus aduncus	101-500	x	10
IUCN Red List of Ecosystems	Drepanocladus cf. sordidus	1-100	x	10
IUCN Red List of Ecosystems	Drepanocladus sordidius	1-100	x	10
IUCN Red List of Ecosystems	Drepanocladus sp.	101-500	x	10
Invertebrates	Dytiscidae	1-100
IUCN Red List of Ecosystems	Ectocarpus confervoides	1-100	x	10
IUCN Red List of Ecosystems	Ectocarpus siliculosus	1001-5000	x	10
Algae	Elachista fucicola	501-1000	x	0.1
Vascular plants	Elatine hydropiper	101-500	x	0.1
Vascular plants	Elatine orthosperma	1-100
Vascular plants	Elatine sp.	101-500
Vascular plants	Elatine triandra	1-100
Invertebrates	Electra crustulenta	10001-50000
IUCN Red List of Ecosystems	Eleocharis acicularis	501-1000	x	10
IUCN Red List of Ecosystems	Eleocharis mamillata	1-100	x	10
IUCN Red List of Ecosystems	Eleocharis palustris	101-500	x	10
IUCN Red List of Ecosystems	Eleocharis palustris var. lindbergii	101-500	x	10
IUCN Red List of Ecosystems	Eleocharis parvula	1-100	x	10
IUCN Red List of Ecosystems	Eleocharis sp.	101-500	x	10
IUCN Red List of Ecosystems	Eleocharis uniglumis	101-500	x	10
IUCN Red List of Ecosystems	Eleocharis uniglumis ssp. uniglumis	1-100	x	10
Vascular plants	Elodea canadensis	1-100
Vascular plants	Elymus repens	1-100
Invertebrates	Embletonia pallida	1-100
Invertebrates	Ephydatia fluviatilis	5001-10000	x	0.1
Vascular plants	Epilobium sp.	1-100
Vascular plants	Equisetum fluviatile	101-500	x	0.1
Vascular plants	Equisetum sp.	1-100
Invertebrates	Eriocheir sinensis	1-100
IUCN Red List of Ecosystems	Eudesme virescens	101-500	x	10
Vascular plants	Euphrasia sp.	1-100
Vascular plants	Festuca rubra	1-100
Vascular plants	Filipendula ulmaria	1-100
IUCN Red List of Ecosystems	Fissidens fontanus	101-500	x	10
IUCN Red List of Ecosystems	Fissidens osmundoides	1-100	x	10
IUCN Red List of Ecosystems	Fissidens sp.	1-100	x	10
IUCN Red List of Ecosystems	Fontinalis antipyretica	1001-5000	x	10
IUCN Red List of Ecosystems	Fontinalis dalecarlica	1-100	x	10
IUCN Red List of Ecosystems	Fontinalis hypnoides	1-100	x	10
IUCN Red List of Ecosystems	Fontinalis sp.	1001-5000	x	10
IUCN Red List of Ecosystems	Fucus radicans	101-500	x	10
IUCN Red List of Ecosystems	Fucus sp.	1001-5000	x	10
IUCN Red List of Ecosystems	Fucus vesiculosus	5001-10000	x	10
IUCN Red List of Ecosystems	Furcellaria lumbricalis	5001-10000	x	10
Invertebrates	Galerucella nymphaea	1-100
Vascular plants	Galium palustre	1-100
Vascular plants	Galium palustre ssp. palustre	1-100
Vascular plants	Galium sp.	1-100
Vascular plants	Galium uliginosum	1-100
Invertebrates	Gammarus sp.	1-100
Vascular plants	Glaux maritima	1-100
Vascular plants	Glyceria fluitans cf.	1-100
Vascular plants	Glyceria maxima	1-100
IUCN Red List of Ecosystems	Halosiphon tomentosus	1-100	x	10
Vascular plants	Hieracium sp.	1-100
IUCN Red List of Ecosystems	Hildenbrandia rubra	1001-5000	x	10
IUCN Red List of Ecosystems	Hildenbrandia sp.	5001-10000	x	10
Vascular plants	Hippophae rhamnoides	1-100
IUCN Red List of Ecosystems	Hippuris cf.vulgaris	1-100	x	10
IUCN Red List of Ecosystems	Hippuris sp.	1-100	x	10
Threatened species	Hippuris tetraphylla	1-100	x	10
IUCN Red List of Ecosystems	Hippuris vulgaris	101-500	x	10
IUCN Red List of Ecosystems	Hippuris vulgaris x tetraphylla	1-100	x	10
IUCN Red List of Ecosystems	Hippuris x-lanceolata	1-100	x	10
Vascular plants	Honkenya pebloides	1-100
Invertebrates	Hydra sp.	1-100
Invertebrates	Hydracarina, Hydrachnellae tai Hydrachnidia	1-100
Invertebrates	Hydrobia sp.	1001-5000
Vascular plants	Hydrocharis morsus-ranae	1-100
IUCN Red List of Ecosystems	Hygrohyphum luridium	1-100	x	10
Invertebrates	Idotea sp.	1-100
Vascular plants	Iris pseudoacorus	1-100
Vascular plants	Isoetes echinospora	101-500
Vascular plants	Isoetes lacustris	1-100	x	0.1
Vascular plants	Isoëtes sp.	1-100
Vascular plants	Juncus articulatus	1-100
Vascular plants	Juncus balticus	1-100
Vascular plants	Juncus bufonius	1-100
Vascular plants	Juncus bulbosus	1-100
Vascular plants	Juncus gerardii	1-100
Vascular plants	Juncus sp.	1-100
IUCN Red List of Ecosystems	Laomeda loveni	101-500	x	10
Vascular plants	Lathyrus japonicus	0
Vascular plants	Lathyrus palustris	1-100
Algae	Leathesia difformis	1-100
IUCN Red List of Ecosystems	Lemna minor	1-100	x	10
Vascular plants	Lemna trisulca	501-1000	x	0.1
Vascular plants	Leondoton autumnalis	1-100
Vascular plants	Leontodon sp.	1-100
IUCN Red List of Ecosystems	Leptodictyum riparium	1-100	x	10
Vascular plants	Leymus arenarius	1-100
Vascular plants	Limosella aquatica	101-500	x	0.1
Algae	Lithoderma sp.	101-500
Invertebrates	Lymnaea stagnalis	1-100
Invertebrates	Lymnea sp.	101-500
Vascular plants	Lysimachia thyrsiflora	1-100
Vascular plants	Lythrum salicaria	1-100
Invertebrates	Macoma baltica	5001-10000	x	0.1
Threatened species	Macroplea pubipennis	1-100
IUCN Red List of Ecosystems	Marchanthiophyta sp.	1-100	x	10
Vascular plants	Menyanthes trifoliata	1-100
Algae	Monostroma balticum	1-100	x	0.1
Algae	Monostroma grevillei	1-100	x	0.1
IUCN Red List of Ecosystems	Monostroma sp.	101-500	x	10
Algae	Mougeotia sp.	1-100
Invertebrates	Mya arenaria	101-500	x	0.1
Vascular plants	Myosotis sp.	1-100
Vascular plants	Myrica gale	1-100
IUCN Red List of Ecosystems	Myriophyllum alterniflorum	1-100	x	10
IUCN Red List of Ecosystems	Myriophyllum cf spicatum	1-100	x	10
IUCN Red List of Ecosystems	Myriophyllum sibiricum	1001-5000	x	10
IUCN Red List of Ecosystems	Myriophyllum sp.	1001-5000	x	10
Vascular plants	Myriophyllum sp./Ceratophyllum sp.	101-500
IUCN Red List of Ecosystems	Myriophyllum spicatum	1001-5000	x	10
IUCN Red List of Ecosystems	Myriophyllum verticillatum	101-500	x	10
Invertebrates	Mysidae	1001-5000
Invertebrates	Mytilopsis leucophaeata	1-100
IUCN Red List of Ecosystems	Mytilus trossulus x edulis	10001-50000	x	10
IUCN Red List of Ecosystems	Najas marina	1001-5000	x	10
IUCN Red List of Ecosystems	Najas marina ssp. intermedia	1-100	x	10
Vascular plants	Najas sp.	1-100
Threatened species	Najas tenuissima	1-100	x	0.1
IUCN Red List of Ecosystems	Nitella flexilis	1-100	x	10
IUCN Red List of Ecosystems	Nitella flexilis vel opaca	1-100	x	10
Threatened species	Nitella hyalina	1-100	x	10
IUCN Red List of Ecosystems	Nitella opaca	1-100	x	10
IUCN Red List of Ecosystems	Nitella sp.	101-500	x	10
IUCN Red List of Ecosystems	Nitella walhbergiana	1-100	x	10
Threatened species	Nitellopsis obtusa	1-100	x	10
Algae	Nitellopsis sp.	1-100
IUCN Red List of Ecosystems	Nuphar lutea	101-500	x	10
IUCN Red List of Ecosystems	Nymphaea alba	101-500	x	10
IUCN Red List of Ecosystems	Nymphaea candida	1-100	x	10
Vascular plants	Nymphaeaceae	1-100
Vascular plants	Odontites sp.	1-100
Invertebrates	Oligochaeta	1-100
Invertebrates	Ostracoda	1-100
IUCN Red List of Ecosystems	Oxyrrhynchium speciosum	1-100	x	10
Invertebrates	Palaemon adspersus	1-100
Invertebrates	Palaemon elegans	1-100
Vascular plants	Parnassia palustris	1-100
Vascular plants	Pedicularis palustris	1-100
Vascular plants	Pedicularis sp.	1-100
Threatened species	Persicaria foliosa	1-100	x	0.1
Vascular plants	Persicaria hydropiper	1-100
Vascular plants	Persicaria lapathifolia ssp. Pallida	1-100
Vascular plants	Peucedanum palustre	1-100
Vascular plants	Phalaris arundinacea	1-100
Vascular plants	Phragmites australis	1001-5000
IUCN Red List of Ecosystems	Phyllophora pseudoceranoides	101-500	x	10
Vascular plants	Picea abies	1-100
IUCN Red List of Ecosystems	Pilayella littoralis	1001-5000	x	10
IUCN Red List of Ecosystems	Pilayella littoralis / Ectocarpus siliculosus	5001-10000	x	10
Invertebrates	Piscicola geometra	1-100
Invertebrates	Pisidium / Sphaerium	1-100
Invertebrates	Planorbarius corneus	1-100
Invertebrates	Planorbidae	1-100
Vascular plants	Plantago major	1-100
Vascular plants	Plantago maritima	1-100
IUCN Red List of Ecosystems	Platyhypnidium riparioides	101-500	x	10
Vascular plants	Poa sp.	1-100
Vascular plants	Poaceae spp.	101-500
Vascular plants	Polygonum aviculare	1-100
Algae	Polyides rotundus	1-100
Invertebrates	Polyps	10001-50000
IUCN Red List of Ecosystems	Polysiphonia fibrillosa	501-1000	x	10
IUCN Red List of Ecosystems	Polysiphonia fucoides	1001-5000	x	10
IUCN Red List of Ecosystems	Polysiphonia sp.	1001-5000	x	10
Vascular plants	Pot pect/Pot fili/Ruppia sp./Zannichellia sp.	1001-5000
IUCN Red List of Ecosystems	Potamogeton alpinus	1-100	x	10
IUCN Red List of Ecosystems	Potamogeton berchtoldii	101-500	x	10
IUCN Red List of Ecosystems	Potamogeton cf.lucens	1-100	x	10
IUCN Red List of Ecosystems	Potamogeton compressus	1-100	x	10
IUCN Red List of Ecosystems	Potamogeton filiformis x pectinatus	1-100	x	10
Threatened species	Potamogeton friesii	1-100	x	10
IUCN Red List of Ecosystems	Potamogeton gramineus	101-500	x	10
IUCN Red List of Ecosystems	Potamogeton gramineus x perfoliatus	1-100	x	10
IUCN Red List of Ecosystems	Potamogeton gramineus x Potamogeton perfoliatus (= P. nitens)	1-100	x	10
IUCN Red List of Ecosystems	Potamogeton lucens	1-100	x	10
IUCN Red List of Ecosystems	Potamogeton natans	1-100	x	10
IUCN Red List of Ecosystems	Potamogeton obstusifolia	1-100	x	10
IUCN Red List of Ecosystems	Potamogeton perfoliatus	5001-10000	x	10
IUCN Red List of Ecosystems	Potamogeton praelongus	1-100	x	10
IUCN Red List of Ecosystems	Potamogeton pusillus	1001-5000	x	10
IUCN Red List of Ecosystems	Potamogeton sp./Stuckenia sp.	101-500	x	10
Invertebrates	Potamopyrgus antipodarum	1-100
Invertebrates	Potamopyrgus jenkinsi	1-100
Vascular plants	Potentilla palustris	1-100
Vascular plants	Potentilla sp.	1-100
Algae	Pseudolithoderma	1001-5000	x	0.1
Algae	Pseudolithoderma / Hildenbrandia	1-100
IUCN Red List of Ecosystems	Racomitrium canescens	1-100	x	10
Invertebrates	Ranatra linearis	1-100
IUCN Red List of Ecosystems	Ranunculus circinatus	101-500	x	10
IUCN Red List of Ecosystems	Ranunculus confervoides	101-500	x	10
IUCN Red List of Ecosystems	Ranunculus peltanus spp. Peltatus	1-100	x	10
IUCN Red List of Ecosystems	Ranunculus peltatus	1-100	x	10
IUCN Red List of Ecosystems	Ranunculus peltatus ssp. baudotii	501-1000	x	10
Vascular plants	Ranunculus reptabundus	1-100
Vascular plants	Ranunculus reptans	1-100	x	0.1
Vascular plants	Ranunculus scleratus	1-100
Vascular plants	Ranunculus sp.	101-500
Invertebrates	Rhithropanopeus harrisii	1-100
Algae	Rhizoclonium sp.	1-100
IUCN Red List of Ecosystems	Rhodocorton purpureum	101-500	x	10
Algae	Rhodocorton spp.	1-100
IUCN Red List of Ecosystems	Rhodomela confervoides	101-500	x	10
Algae	Rhodophyta	101-500
Bacteria	Rivularia sp.	1001-5001	x	0.1
Vascular plants	Rumex acetosa ssp. Acetosa	1-100
Vascular plants	Rumex aquaticus	1-100
Vascular plants	Rumex longifolia	1-100
Vascular plants	Rumex longifolius	1-100
Vascular plants	Rumex sp.	1-100
Vascular plants	Ruppia cirrhosa	101-500	x	0.1
Vascular plants	Ruppia maritima	101-500	x	0.1
Vascular plants	Ruppia maritima var. brevirostris	1-100	x	0.1
Vascular plants	Ruppia maritima var. Maritima	1-100	x	0.1
IUCN Red List of Ecosystems	Ruppia sp.	501-1000	x	10
Invertebrates	Saduria entomon	5001-10000	x	0.1
Vascular plants	Sagittaria natans	1-100	x	0.1
Vascular plants	Sagittaria sagittifolia	1-100	x	0.1
Vascular plants	Sagittaria sagittifolia x natans	101-500
Vascular plants	Sagittaria sp.	1-100
Vascular plants	Salix phylicifolia	1-100
Vascular plants	Salix sp.	1-100
Threatened species	Samolus valerandi	1-100
Vascular plants	Schoenoplectus lacustris	1-100	x	0.1
Vascular plants	Schoenoplectus maritimus	1-100	x	0.1
Vascular plants	Schoenoplectus sp.	101-500
Vascular plants	Schoenoplectus tabernaemontani	101-500	x	0.1
IUCN Red List of Ecosystems	Scorpidium sp	1-100	x	10
Algae	Scytosiphon lomentaria	1-100	x	0.1
Invertebrates	Siphon holes	501-1000
IUCN Red List of Ecosystems	Sparganium angustifolia	1-100	x	10
IUCN Red List of Ecosystems	Sparganium emersum	1-100	x	10
IUCN Red List of Ecosystems	Sparganium gramineum	1-100	x	10
IUCN Red List of Ecosystems	Sparganium natans	1-100	x	10
Vascular plants	Sparganium sp	101-500
Vascular plants	Spergularia salina	1-100
Vascular plants	Spergularia salina cf.	1-100
IUCN Red List of Ecosystems	Sphacelaria arctica	1001-5000	x	10
IUCN Red List of Ecosystems	Sphacelaria radicans	1-100	x	10
IUCN Red List of Ecosystems	Sphacelaria sp.	501-1000	x	10
Algae	Spirogyra	101-500
Invertebrates	Spongilla lacustris	1-100
IUCN Red List of Ecosystems	Spongomorpha aeruginosa	1-100	x	10
Vascular plants	Stellaria sp.	1-100
IUCN Red List of Ecosystems	Stictyosiphon tortilis	501-1000	x	10
Vascular plants	Stratiotes aloides	1-100
IUCN Red List of Ecosystems	Stuckenia filiformis	1001-5000	x	10
IUCN Red List of Ecosystems	Stuckenia pectinata (Potamogeton pectinatus)	10001-50000	x	10
IUCN Red List of Ecosystems	Stuckenia vaginata	1-100	x	10
Vascular plants	Subularia aquatica	101-500	x	0.1
Invertebrates	Theodoxus fluviatilis	101-500
IUCN Red List of Ecosystems	Tolypella nidifica	1001-5000	x	10
IUCN Red List of Ecosystems	Tolypella sp.	1-100	x	10
Invertebrates	Trichoptera	1-100
Vascular plants	Triglochin maritima	1-100	x	0.1
Vascular plants	Triglochin palustris	1-100
Vascular plants	Triglochin sp.	1-100
Vascular plants	Typha angustifolia	1-100	x	0.1
Vascular plants	Typha latifolia	1-100	x	0.1
Vascular plants	Typha sp.	1-100
IUCN Red List of Ecosystems	Ulothrix sp.	1-100	x	10
IUCN Red List of Ecosystems	Ulothrix zonata	101-500	x	10
IUCN Red List of Ecosystems	Ulva (Enteromorpha) intestinalis	101-500	x	10
IUCN Red List of Ecosystems	Ulva (Enteromorpha) procera	101-500	x	10
Algae	Ulva lactuca	0
IUCN Red List of Ecosystems	Ulva sp.	1001-5000	x	10
Invertebrates	Unio spp.	1-100
Invertebrates	Unionidae	1-100
Invertebrates	Unionidae shells	1-100
Vascular plants	Utricularia australis	1-100
Vascular plants	Utricularia intermedia	1-100
Vascular plants	Utricularia minor	1-100	x	0.1
Vascular plants	Utricularia sp.	101-500
Vascular plants	Utricularia vulgaris	1-100	x	0.1
Vascular plants	Valeriana sp.	1-100
IUCN Red List of Ecosystems	Warnstorfia sp.	1-100	x	10
IUCN Red List of Ecosystems	Warnstorfia trichophylla	1-100	x	10
IUCN Red List of Ecosystems	Vaucheria sp.	1001-5000	x	10
Vascular plants	Veronica longifolia	1-100
Vascular plants	Vicia cracca	1-100
Vascular plants	Viola sp.	1-100
Invertebrates	Viviparus contectus	1-100
Invertebrates	Viviparus sp.	1-100
Invertebrates	Worm pipes	101-500
IUCN Red List of Ecosystems	Zannichellia major	101-500	x	10
IUCN Red List of Ecosystems	Zannichellia palustris	1001-5000	x	10
IUCN Red List of Ecosystems	Zannichellia palustris var. pedicellata	101-500	x	10
IUCN Red List of Ecosystems	Zannichellia palustris var. repens	101-500	x	10
IUCN Red List of Ecosystems	Zannichellia sp.	1001-5000	x	10
IUCN Red List of Ecosystems	Zostera marina	501-1000	x	10
Algae	Zygnema sp.	1-100
